# Supplementary material for: Comparison of Optical Coherence Tomography Angiography to Indocyanine Green Angiography and Slit Lamp Photography for Corneal Vascularization in an Animal Model
Source: PubMed Central journal article supplement (PMC6068177; doi:10.1038/s41598-018-29752-5), 2018-07-31

# Title: Comparison of Optical Coherence Tomography Angiography to Indocyanine Green Angiography for Corneal Vascularization in an Animal Model

Authors: Tisha P. Stanzel<sup>1</sup>, Kavya Devarajan<sup>1</sup>, Nyein C. Lwin<sup>1</sup>, Gary H. Yam<sup>1,2</sup>, Leopold Schmetterer<sup>1,2,3,4,5</sup>, Jodhbir S. Mehta<sup>1,2,3,6</sup>, Marcus Ang<sup>1,2,6,\*</sup>

## Supplementary Graph: Vessels density measurements from indocyanine green angiography (ICGA) compared with slit lamp photography (SLP)

Good agreement of vessel density measurements between ICGA and SLP was observed with mean difference of  $0.02 \pm 0.07$  % (95%CI: - 0.0413 to 0.0053 %),  $P = 0.11$  (10 sets of paired images)

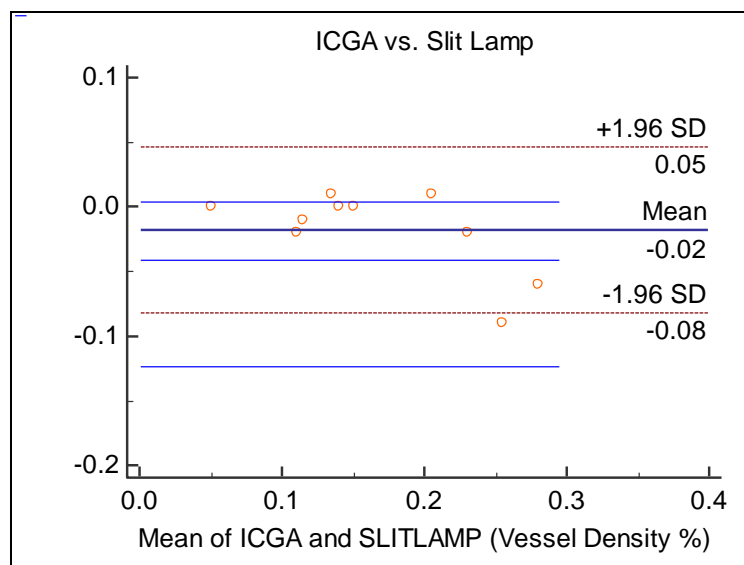

Supplement: 41598_2018_29752_MOESM1_ESM.pdf [file 41598_2018_29752_MOESM1_ESM.pdf]
